# Supplementary material for: Benzoxazine Monomers and Polymers Based on 3,3’-Dichloro-4,4’-Diaminodiphenylmethane: Synthesis and Characterization
Source: Preprints.org preprint supplement (doi:10.20944/preprints202012.0594.v1), 2020-12-23
Supplement: Supplementary file 1 [file supplementary]

Supplementary material

|  |
| --- |

**Figure 1.** 1H NMR spectrum of benzoxazine based on 4,4’-diaminodiphenylmethane in toluene/isopropanol 2:1.

|  |
| --- |

**Figure 2.** 13C NMR spectrum of benzoxazine based on 4,4’-diaminodiphenylmethane in toluene/isopropanol 2:1.

|  |
| --- |

**Figure 3.** DSC curves of polybenzoxazines based on diamines (heating rate 10 deg / min).

|  |
| --- |

**Figure 4.** Mass spectrum of degradation of polybenzoxazine P-q in the air at 343 oC.

|  |
| --- |

**Figure 5.** Mass spectrum of degradation of polybenzoxazine P-q in the argon at 373 oC.

|  |
| --- |

**Figure 6.** Mass spectrum of degradation of polybenzoxazine P-q in the argon at 438 oC.

|  |
| --- |

**Figure 7.** Mass spectrum of degradation of polybenzoxazine P-q in the argon at 445 oC.

| 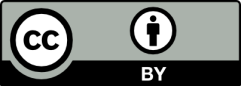 | © 2020 by the authors. Submitted for possible open access publication under the terms and conditions of the Creative Commons Attribution (CC BY) license (http://creativecommons.org/licenses/by/4.0/). |
| --- | --- |
